# Supplementary material for: Insights of warm cloud biases in CAM5 and CAM6 from the single-column modeling framework and ACE-ENA observations
Source: Copernicus journal article supplement (doi:10.5194/egusphere-2023-587), 2023-03-30
Supplement: Supplementary file 1 [file egusphere-2023-587-supplement.pdf]

*Supplement of*

**Insights of warm cloud biases in CAM5 and CAM6 from the single-column modeling framework and ACE-ENA observations**

**Yuan Wang<sup>1,\*</sup>, Xiaojian Zheng<sup>2</sup>, Xiquan Dong<sup>2</sup>, Baike Xi<sup>2</sup>, and Yuk L. Yung<sup>3</sup>**

<sup>1</sup>Department of Earth, Atmosphere, and Planetary Sciences, Purdue University, West Lafayette, IN, USA

<sup>2</sup>Department of Hydrology and Atmospheric Sciences, University of Arizona, Tucson, AZ, USA

<sup>3</sup>Division of Geological and Planetary Sciences, California Institute of Technology, Pasadena, CA, USA

**\*Corresponding author: Yuan Wang ([yuanwang@purdue.edu](mailto:yuanwang@purdue.edu))**

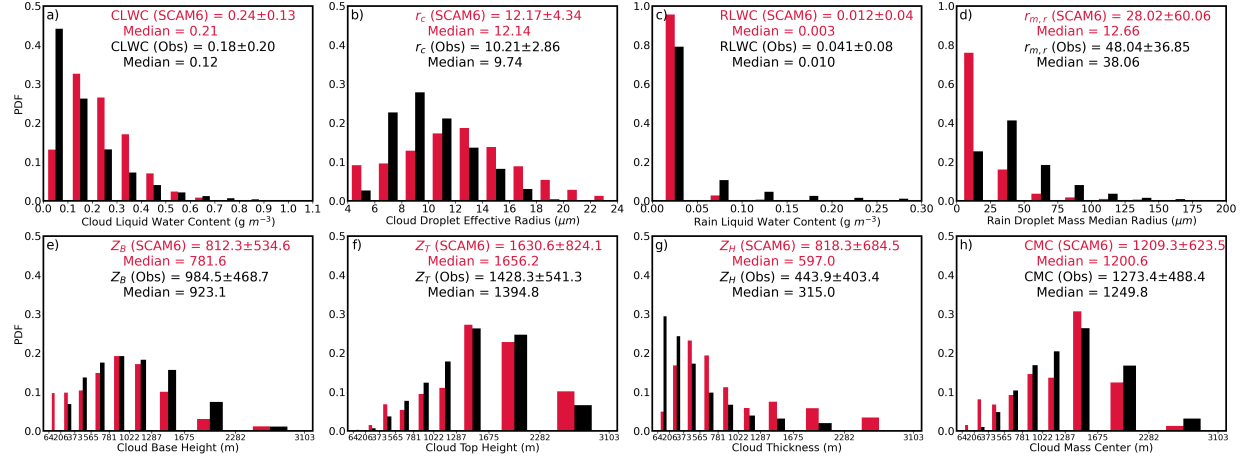

**Figure S1.** The same with Fig. 3 but the samples are selected based on the criteria of consecutive cloud layers lasting more than 2 hours with the cloud top heights less than 3 km, in order to focus on the signals of stratus and stratocumulus clouds.

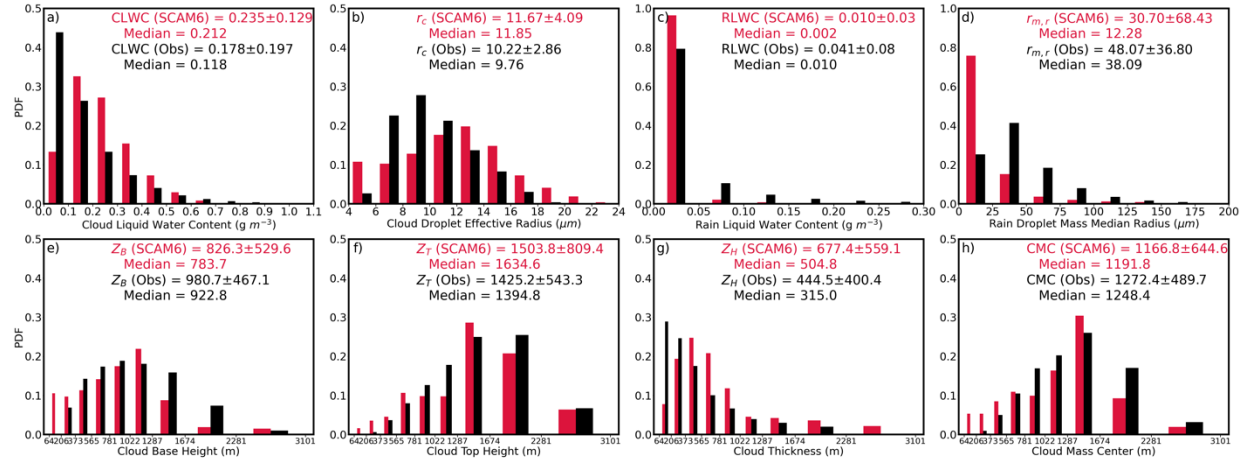

**Figure S2.** The same with Fig. 3 but for the sensitivity experiment in which all Q related variables (both state variables and tendency terms) are scaled down by a factor of 0.85 in the large-scale forcing dataset.

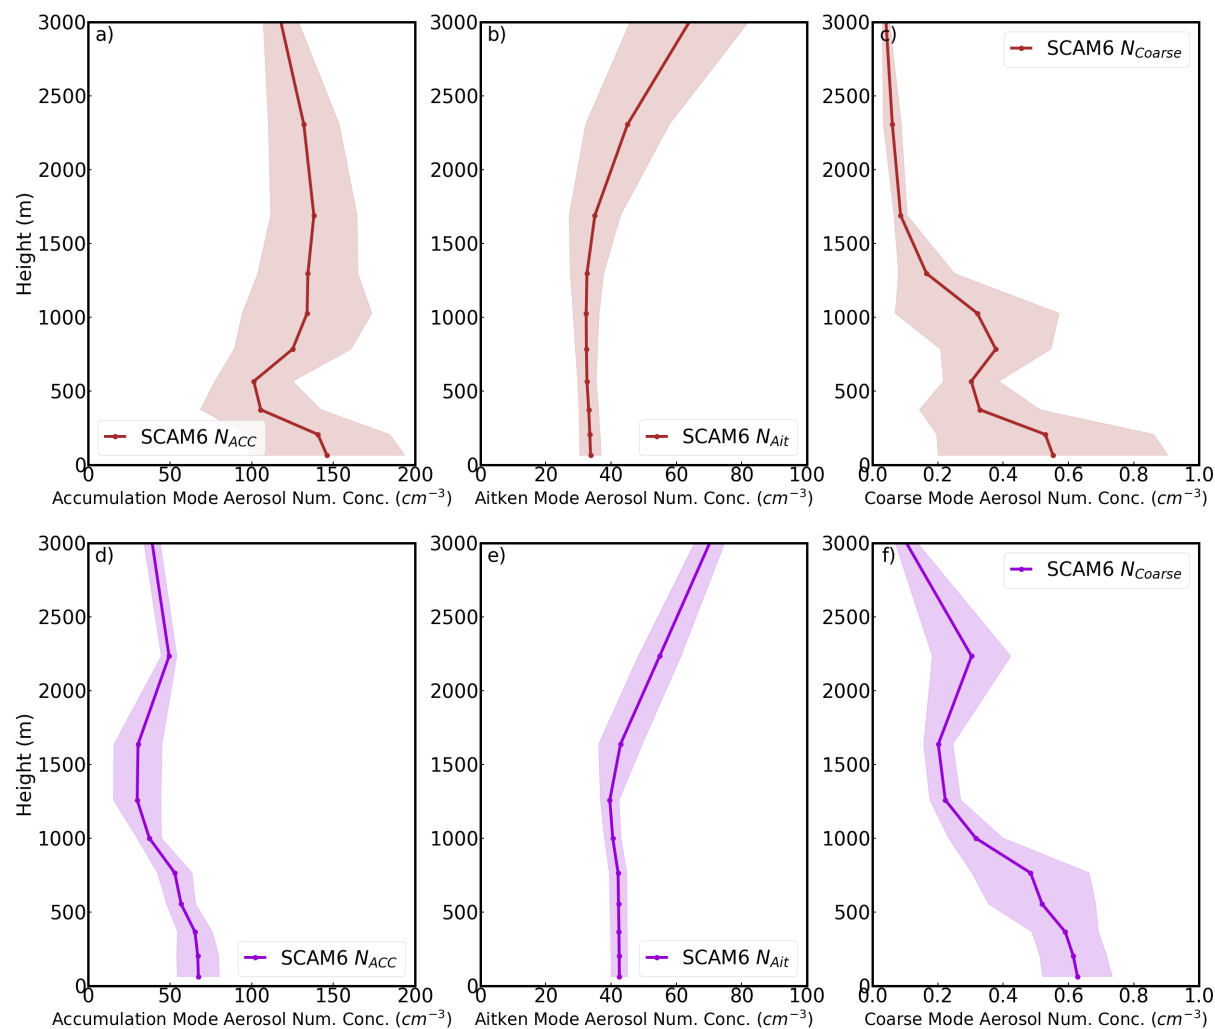

**Figure S3.** Vertical profiles of SCAM6 simulated aerosol number concentrations of Aitken mode (a, d); Accumulation mode (b, e); Coarse mode (c, f), during the Summer (brown) and Winter (purple) ACE-ENA IOPs.

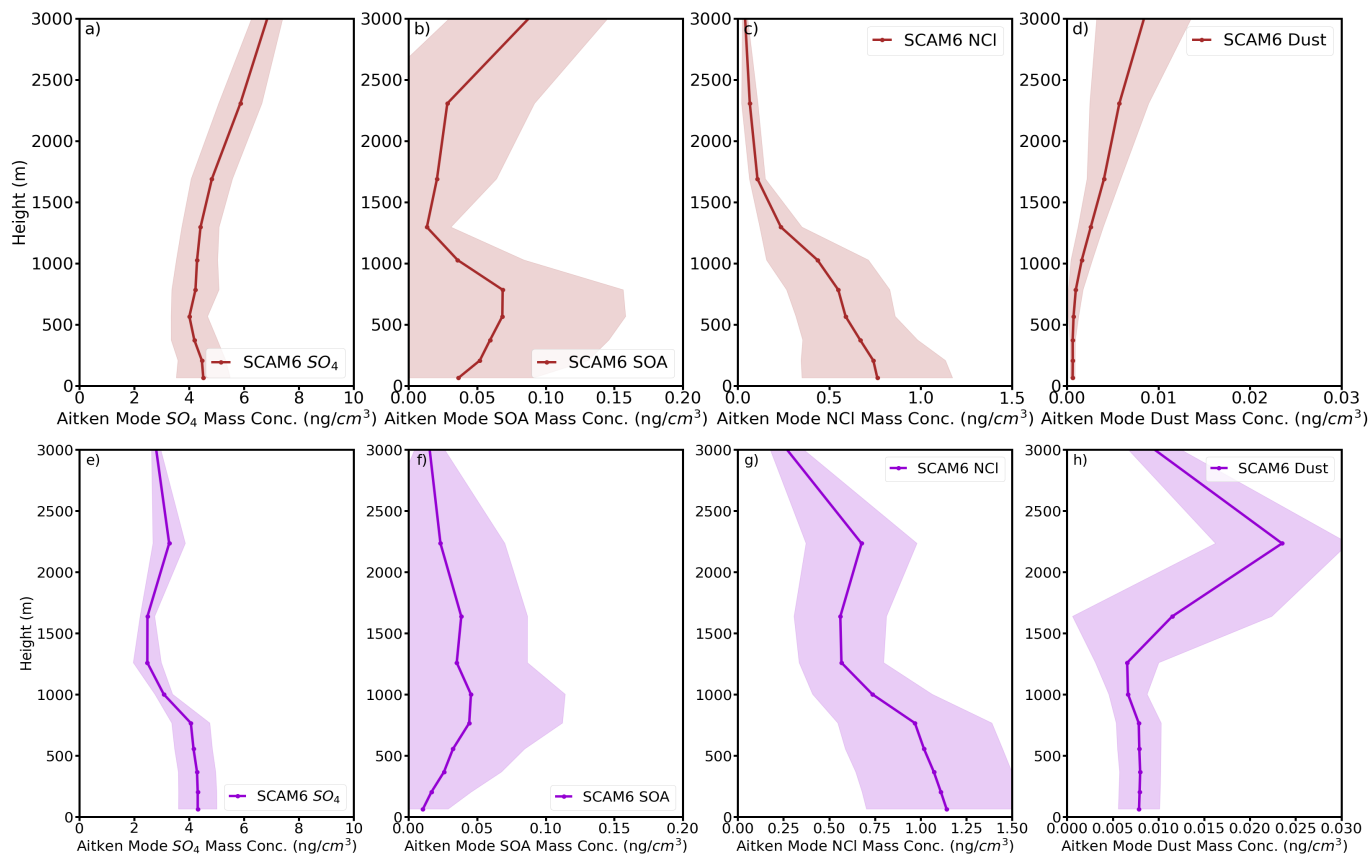

**Figure S4.** Vertical profiles of SCAM6 simulated Aitken mode aerosol chemical component mass concentrations of sulfate (a, e); SOA (b, f); NCI (c, g); Dust (d, h), during the Summer (brown) and Winter (purple) ACE-ENA IOPs.
